## Research Paper

# MET exon 14 skipping defines a unique molecular class of non-small cell lung cancer

Difan Zheng<sup>1,2,\*</sup>, Rui Wang<sup>1,2,\*</sup>, Ting Ye<sup>1,2,\*</sup>, Su Yu<sup>1,2,5</sup>, Haichuan Hu<sup>1,2,7</sup>, Xuxia Shen<sup>2,3</sup>, Yuan Li<sup>2,3</sup>, Hongbin Ji<sup>6,\*</sup>, Yihua Sun<sup>1,2,\*</sup>, Haiquan Chen<sup>1,2,4,\*</sup>

<sup>1</sup>Department of Thoracic Surgery, Fudan University Shanghai Cancer Center, Shanghai, China

<sup>2</sup>Department of Oncology, Shanghai Medical College, Fudan University, Shanghai, China

<sup>3</sup>Department of Pathology, Fudan University Shanghai Cancer Center, Shanghai, China

<sup>4</sup>Institutes of Biomedical Sciences, Fudan University, Shanghai, China

<sup>5</sup>Cancer Research Laboratory, Fudan University Shanghai Cancer Center, Shanghai, China

<sup>6</sup>Innovation Center for Cell Signaling Network, Institute of Biochemistry and Cell Biology, Shanghai Institutes for Biological Sciences, Chinese Academy of Science, Shanghai, China

<sup>7</sup>Massachusetts General Hospital Cancer Center, Boston, MA, USA

\*These authors contributed equally to this work

**Correspondence to:** Haiquan Chen, **email:** hqchen1@yahoo.com  
Yihua Sun, **email:** Sun\_yihua76@hotmail.com

**Keywords:** *MET*, non-small cell lung cancer, surgery, targeted therapy

**Received:** November 10, 2015

**Accepted:** April 08, 2016

**Published:** May 21, 2016

## ABSTRACT

**Purpose:** Recurrent *MET* exon 14 splicing has been revealed in lung cancers and is a promising therapeutic target. Because we have limited knowledge about the natural history of *MET* mutant tumors, the current study was aiming to determine the clinical and pathological characteristics in non-small cell lung cancers (NSCLC).

**Results:** Twenty-three patients (1.3%) were positive for *MET* exon 14 skipping. Patients with *MET* exon 14 skipping displayed unique characteristics: female, non-smokers, earlier pathology stage and older age. *MET* exon 14 skipping indicated an early event as other drivers in lung cancer, while *MET* copy number gain was more likely a late event in lung cancer. Overall survival (OS) of patients harboring *MET* exon 14 skipping was longer than patients with *KRAS* mutation. Almost four-fifths of the lung tumors with *MET* exon 14 skipping had *EGFR* and/or *HER2* gene copy number gains. *EGFR* inhibitor showed moderate antitumor activity in treatment of a patient harboring *MET* exon 14 skipping.

**Patients and Methods:** From October 2007 to June 2013, we screened 1770 patients with NSCLC and correlated *MET* status with clinical pathologic characteristics and mutations in *EGFR*, *KRAS*, *BRAF*, *HER2*, and *ALK*. Quantitative Real-Time PCR was used to detect *MET* gene copy number gain. Immunohistochemistry (IHC) was also performed to screen *MET* exon 14 skipping. Clinicopathological characteristics and survival information were analyzed.

**Conclusions:** *MET* exon 14 skipping was detected in 1.3% (23/1770) of the Chinese patients with NSCLC. *MET* exon 14 skipping defined a new molecular subset of NSCLC with identifiable clinical characteristics. The therapeutic *EGFR* inhibitors might be an alternative treatment for patients with *MET* mutant NSCLC.

## INTRODUCTION

Lung cancer is the leading cause of cancer deaths worldwide. Non-small cell lung cancer (NSCLC) comprises over 80% of all lung tumors. With better understanding of the major genetic alterations and signaling pathways involved of lung cancer, it has been classified into various subsets with different molecular and clinicopathologic characteristics [1]. Target-based therapeutics designed to specific molecular clusters have revolutionized lung cancer treatment. The most representative examples are gefitinib/erlotinib and crizotinib for lung adenocarcinomas harboring *EGFR* mutations and *ALK/ROS1* fusion, respectively [2, 3]. Even with broad genotyping, there remains 20%–40% of lung adenocarcinoma and 80% of lung squamous cell carcinoma without any known targetable oncogenic mutations [4–7].

*MET*, encoding the proto-oncogene tyrosine kinase *c-MET*, is the receptor for hepatocyte growth factor (HGF). The activation of this kinase by amplification and overexpression could promote cancer [8–10]. *MET* amplification is uncommon in NSCLCs and was observed in 2%–4% of previously untreated patients [8, 9, 11]. *MET* targeted therapies are currently undergoing early-phase clinical trial evaluations in lung cancer patients [12, 13].

Recently, *MET* gene exon 14 skipping was identified as a potential driver mutation in lung and colon tumors [14–18]. Strikingly, NSCLC patients harboring these genetic alterations have shown remarkable responses to *MET* inhibitor (crizotinib or cabozantinib) in several independent early-phase trials, suggesting that *MET* might be a novel druggable target in lung cancers [15–18]. The clinicopathologic characteristics of lung cancer patients with *MET* exon 14 skipping have not yet been described. These results provide us with an impetus to understand the natural history of *MET* mutant tumors.

Here, we demonstrated that *MET* exon 14 skipping is a novel oncogenic driver in lung cancers by clinical and pathological characteristics. This new molecular subset of patients had distinct features, allowing clinicians to select enriched subpopulations for genotyping and with whom randomized prospective clinical trials of targeted therapies could be efficiently performed.

## RESULTS

### Clinicopathological characteristics

From October 2007 to June 2013, we screened out 1770 qualified patients in this study cohort, including 1305 adenocarcinomas, 48 adenosquamous carcinomas and 417 squamous cell carcinomas. There were 991 (56.0%) male patients and 779 (44.0%) female patients. Ages below or above 60 years old were almost equally distributed. Seven hundred and seventy-nine patients were current smokers

or former smokers; nine hundred and ninety-one patients were non-smokers. Obviously, most adenocarcinomas were female and non-smoking patients. Squamous cell carcinomas predominantly occurred in male and smoking patients. More detailed information was illustrated in Table 1.

### Screening of *MET* exon 14 skipping in 1770 NSCLCs

The genetic alterations of 14 genes were screened in all NSCLCs (Table 1, Figure 1). Of 1770 patients, *MET* exon 14 skipping was detected in 23 patients (1.3%), which was the fourth most frequently identified driver in NSCLCs (Figure 1A) (Detailed data was shown in Supplementary Table S2). It was found in 21 (1.6%) of 1305 adenocarcinomas, and in two (4.2%) of 48 adenosquamous cell carcinomas. No mutant *MET* was detected in squamous carcinomas. We further revealed that 1.9% (17 of 904) of non-smoking lung adenocarcinomas (NSLAD) harbored *MET* exon 14 skipping (Figure 1B). Among 80 NSLADs that were negative for known oncogenic drivers, 21.25% of them harbored mutant *MET*.

### IHC analysis of *MET* exon 14 skipping positive NSCLCs

*MET* exon 14 skipping can only be detected using mRNA isolated from frozen tissues, which are commonly not available in clinical practice. Thus, we examined whether IHC could be utilized as a screening tool for detecting mutant *MET*. Of the 23 *MET* positive samples subjected to IHC, four scored as negative, nine as weak, eight as moderate, and two as strong. Another 64 pan-negative lung adenocarcinomas were also stained for *MET* protein; 42 scored as negative, 12 scored as weak, seven as moderate, and three as strong (Figure 3). The frequency of samples with *MET* positive in *MET* exon 14 skipping tumors was significantly higher than that in pan-negative samples (82.6% VS. 34.4%, Chi-Square test,  $p < 0.0001$ ).

### *EGFR* and/or *HER2* copy number gains were common in *MET* Exon 14 skipping lung tumors

We showed that 18 of 23 (78.3%) lung tumors with *MET* exon 14 skipping had *EGFR* and/or *HER2* gene copy number gains. Among 19 invasive lung cancers, 94.7% of *MET* mutant tumors showed *EGFR* and/or *HER2* gene copy gains, but none of the cases with AAH/AIS harbored *EGFR* or *HER2* gene copy alterations (Table 3), indicating the pivotal role of *EGFR* or *HER2* in formation of invasive lung carcinoma in *MET* positive tumors. We also found that *EGFR* copy number gain was seen in all lung adenocarcinoma patients whose tumor harbored *MET* exon 14 skipping in TCGA (The Cancer Genome Atlas) cohort [6].

**Table 1: Clinical characteristics of 1770 patients with NSCLC**

|                         | Adenocarcinoma |       | Adenosquamous carcinoma |       | Squamous cell carcinoma |        |
|-------------------------|----------------|-------|-------------------------|-------|-------------------------|--------|
|                         | No.            | %     | No.                     | %     | No.                     | %      |
| <b>Total</b>            | 1305           |       | 48                      |       | 417                     |        |
| <b>Sex</b>              |                |       |                         |       |                         |        |
| Male                    | 573            | 43.9% | 34                      | 70.8% | 384                     | 92.1%  |
| Female                  | 732            | 56.1% | 14                      | 29.2% | 33                      | 7.9%   |
| <b>Age</b>              |                |       |                         |       |                         |        |
| > 60 y                  | 657            | 50.3% | 29                      | 60.4% | 228                     | 54.7%  |
| < 60 y                  | 648            | 49.7% | 19                      | 39.6% | 189                     | 45.3%  |
| <b>Smoking status</b>   |                |       |                         |       |                         |        |
| Smoker                  | 401            | 30.7% | 27                      | 56.3% | 351                     | 84.2%  |
| Never-smoker            | 904            | 69.3% | 21                      | 43.8% | 66                      | 15.8%  |
| <b>Pathologic stage</b> |                |       |                         |       |                         |        |
| 0                       | 32             | 2.5%  | 0                       | 0.0%  | 0                       | 0.0%   |
| IA                      | 510            | 39.1% | 7                       | 14.6% | 70                      | 16.8%  |
| IB                      | 171            | 13.1% | 11                      | 22.9% | 104                     | 24.9%  |
| IIA                     | 113            | 8.7%  | 3                       | 6.3%  | 65                      | 15.6%  |
| IIB                     | 43             | 3.3%  | 5                       | 10.4% | 47                      | 11.3%  |
| IIIA                    | 352            | 27.0% | 21                      | 43.8% | 125                     | 30.0%  |
| IIIB                    | 30             | 2.3%  | 1                       | 2.1%  | 4                       | 1.0%   |
| IV                      | 54             | 4.1%  | 0                       | 0.0%  | 2                       | 0.5%   |
| <b>Differentiation</b>  |                |       |                         |       |                         |        |
| Well                    | 197            | 15.1% | 0                       | 0.0%  | 8                       | 1.9%   |
| Moderate                | 734            | 56.2% | 16                      | 33.3% | 188                     | 45.1%  |
| Poor                    | 374            | 28.7% | 32                      | 66.7% | 221                     | 53.0%  |
| <b>EGFR Mutation</b>    |                |       |                         |       |                         |        |
| Present                 | 855            | 65.5% | 20                      | 41.7% | 17                      | 4.1%   |
| Absent                  | 450            | 34.5% | 28                      | 58.3% | 400                     | 95.9%  |
| <b>KRAS Mutation</b>    |                |       |                         |       |                         |        |
| Present                 | 107            | 8.2%  | 6                       | 12.5% | 6                       | 1.4%   |
| Absent                  | 1198           | 91.8% | 42                      | 87.5% | 411                     | 98.6%  |
| <b>HER2 Insertion</b>   |                |       |                         |       |                         |        |
| Present                 | 32             | 2.5%  | 1                       | 2.1%  | 4                       | 1.0%   |
| Absent                  | 1273           | 97.5% | 47                      | 97.9% | 413                     | 99.0%  |
| <b>BRAF Mutation</b>    |                |       |                         |       |                         |        |
| Present                 | 20             | 1.5%  | 0                       | 0.0%  | 0                       | 0.0%   |
| Absent                  | 1285           | 98.5% | 4                       | 8.3%  | 417                     | 100.0% |
| <b>ALK Fusion</b>       |                |       |                         |       |                         |        |
| Present                 | 70             | 5.4%  | 4                       | 8.3%  | 2                       | 0.5%   |
| Absent                  | 1235           | 94.6% | 44                      | 91.7% | 415                     | 99.5%  |
| <b>RET Fusion</b>       |                |       |                         |       |                         |        |
| Present                 | 18             | 1.4%  | 2                       | 4.2%  | 0                       | 0.0%   |

|                        |      |       |    |        |     |        |
|------------------------|------|-------|----|--------|-----|--------|
| Absent                 | 1287 | 98.6% | 46 | 95.8%  | 417 | 100.0% |
| <b>ROS1 Fusion</b>     |      |       |    |        |     |        |
| Present                | 11   | 0.8%  | 0  | 0.0%   | 0   | 0.0%   |
| Absent                 | 1294 | 99.2% | 48 | 100.0% | 417 | 100.0% |
| <b>FGFR1/3 Fusion</b>  |      |       |    |        |     |        |
| Present                | 6    | 0.5%  | 0  | 0.0%   | 12  | 2.9%   |
| Absent                 | 1299 | 99.5% | 48 | 100.0% | 405 | 97.1%  |
| <b>MET Skipping</b>    |      |       |    |        |     |        |
| Present                | 21   | 1.6%  | 2  | 4.2%   | 0   | 0.0%   |
| Absent                 | 1284 | 98.4% | 46 | 95.8%  | 417 | 100.0% |
| <b>PIK3CA Mutation</b> |      |       |    |        |     |        |
| Present                | 22   | 1.7%  | 1  | 2.4%   | 12  | 7.5%   |
| Absent                 | 1270 | 98.3% | 40 | 97.6%  | 147 | 92.5%  |
| <b>CTNNB1 Mutation</b> |      |       |    |        |     |        |
| Present                | 32   | 3.8%  | 1  | 2.4%   | 2   | 0.5%   |
| Absent                 | 815  | 96.2% | 40 | 97.6%  | 371 | 99.5%  |

### Clinicopathologic characteristics of patients with *MET* exon 14 skipping

Here, we demonstrated that patients harboring *MET* exon 14 skipping defined a novel genetic subset of NSCLC. Patients with *MET* exon 14 skipping displayed unique characteristics: female, non-smokers, earlier pathology stage and older age (Table 2). Lepidic/acinar component were present in 58.8% of invasive lung adenocarcinomas with *MET* exon 14 skipping (Table 3). Atypical adenomatous hyperplasia (AAH)/adenocarcinoma *in situ* (AIS) were observed in 17.4% (4 of 23) of *MET* positive tumors, indicating that it was an early event as other drivers in lung cancer. In contrast to

patients with *MET* exon 14 skipping, patients with *MET* copy number gain were more prone to have late stage disease, poor differentiation, and acinar/solid/invasive mucinous adenocarcinoma (Table 4), indicating that *MET* copy number gain is a late event in lung cancer.

The proportion of precancerous or early lesions (AAH/AIS/Lepidic) (38.1%) in *MET* exon 14 skipping tumors was significantly higher than that of *EGFR* (15.9%), *KRAS* (5.6%), *HER2* (21.9%), *BRAF* (15%), *ALK* (2.9%), *RET* (5.6%), and pan-negative (10.3%) lung adenocarcinomas, indicating that mutant *MET* alone might be insufficient to transform normal cells but depend on other genetic alterations progressing into more aggressive carcinoma subtypes.

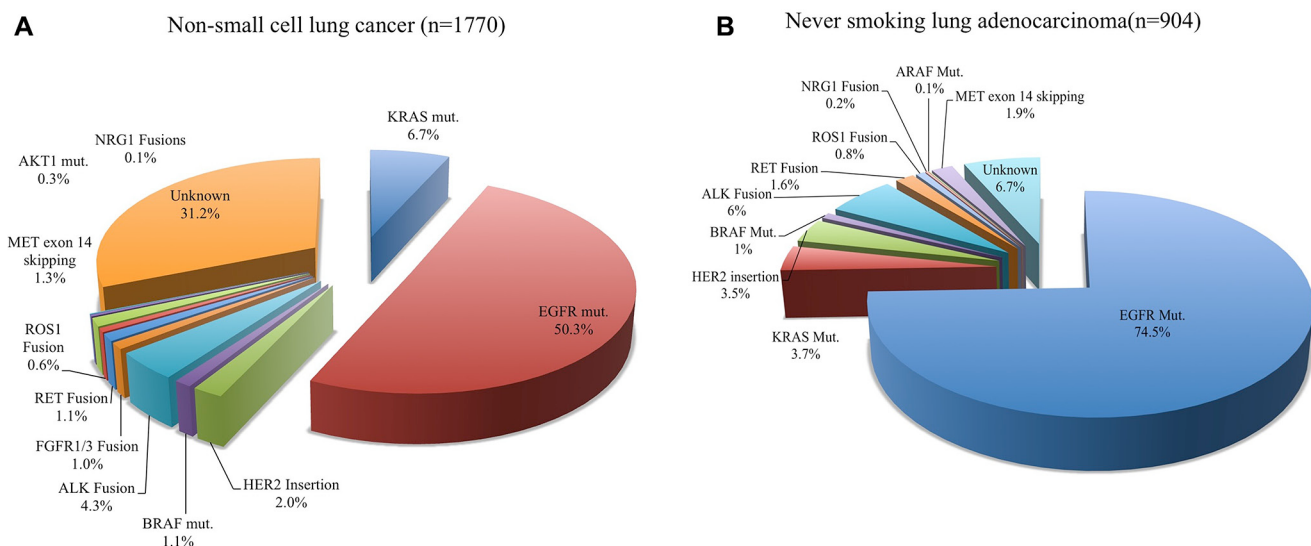

**Figure 1: Mutational profiles in non-small cell lung cancer.** (A) Oncogenic driver mutations in 1770 non-small cell lung cancers; (B) Oncogenic driver mutations in 904 non-smoking lung adenocarcinomas.

**Table 2: Clinicopathologic characteristics of patients with *MET* exon 14 skipping in lung adenocarcinomas**

|                        | <i>MET</i><br>skipping |      | <i>EGFR</i> |      | <i>P</i> | <i>KRAS</i> |      | <i>P</i> | <i>ALK</i> |      | <i>P</i> | *Pan-negative |      | <i>P</i> |
|------------------------|------------------------|------|-------------|------|----------|-------------|------|----------|------------|------|----------|---------------|------|----------|
| <b>Total</b>           | 21                     |      | 855         | %    |          | 107         | %    |          | 70         | %    |          | 165           | %    |          |
| <b>Gender</b>          |                        |      |             |      |          |             |      |          |            |      |          |               |      |          |
| Male                   | 7                      | 33.3 | 312         | 36.5 |          | 85          | 79.4 |          | 26         | 37.1 |          | 114           | 69.1 |          |
| Female                 | 14                     | 66.7 | 543         | 63.5 | .823     | 22          | 20.6 | .001     | 44         | 62.9 | .802     | 51            | 30.9 | .003     |
| <b>Age</b>             |                        |      |             |      |          |             |      |          |            |      |          |               |      |          |
| ≥ 60 y                 | 17                     | 81.0 | 440         | 51.5 |          | 48          | 44.9 |          | 23         | 32.9 |          | 93            | 56.4 |          |
| < 60 y                 | 4                      | 19.0 | 415         | 48.5 | .008     | 59          | 55.1 | .003     | 47         | 67.1 | .001     | 72            | 43.6 | .035     |
| <b>Smoking status</b>  |                        |      |             |      |          |             |      |          |            |      |          |               |      |          |
| Smoking                | 4                      | 19   | 182         | 21.3 |          | 73          | 68.2 |          | 16         | 22.9 |          | 102           | 61.8 |          |
| Never                  | 17                     | 81   | 673         | 78.7 | .529     | 34          | 31.8 | .001     | 54         | 77.1 | .485     | 63            | 38.2 | .001     |
| <b>Tumor size</b>      |                        |      |             |      |          |             |      |          |            |      |          |               |      |          |
| < 3 cm                 | 13                     | 61.9 | 560         | 65.5 |          | 52          | 48.6 |          | 38         | 54.3 |          | 75            | 45.5 |          |
| ≥ 3 cm                 | 8                      | 38.1 | 289         | 33.8 | .816     | 55          | 51.4 | .341     | 32         | 45.7 | .621     | 90            | 54.5 | .171     |
| <b>LN</b>              |                        |      |             |      |          |             |      |          |            |      |          |               |      |          |
| 0                      | 15                     | 71.4 | 553         | 64.7 |          | 68          | 63.6 |          | 31         | 44.3 |          | 91            | 55.2 |          |
| 1                      | 5                      | 23.8 | 78          | 9.1  |          | 12          | 11.2 |          | 15         | 21.4 |          | 11            | 6.7  |          |
| 2                      | 1                      | 4.8  | 219         | 25.6 |          | 26          | 24.3 |          | 19         | 27.1 |          | 60            | 36.4 |          |
| 3                      | 0                      | 0    | 5           | 0.6  | .037     | 1           | 0.9  | .131     | 5          | 7.1  | .056     | 3             | 1.8  | .004     |
| <b>Stage</b>           |                        |      |             |      |          |             |      |          |            |      |          |               |      |          |
| 0                      | 4                      | 19   | 16          | 1.9  |          | 0           | 0    |          | 1          | 1.4  |          | 5             | 3    |          |
| I                      | 11                     | 52.4 | 482         | 56.4 |          | 53          | 49.5 |          | 26         | 37.1 |          | 68            | 41.2 |          |
| II                     | 5                      | 23.8 | 88          | 10.3 |          | 21          | 19.6 |          | 12         | 17.1 |          | 25            | 15.2 |          |
| III                    | 1                      | 4.8  | 230         | 26.9 |          | 30          | 28.0 |          | 28         | 40.0 |          | 61            | 37.0 |          |
| IV                     | 0                      | 0    | 39          | 4.6  | .001     | 3           | 2.8  | .001     | 3          | 4.3  | .001     | 6             | 3.6  | .001     |
| <b>Differentiation</b> |                        |      |             |      |          |             |      |          |            |      |          |               |      |          |
| Well                   | 6                      | 28.6 | 139         | 16.3 |          | 11          | 10.3 |          | 6          | 8.6  |          | 19            | 11.5 |          |
| Moderate               | 8                      | 38.1 | 519         | 60.7 |          | 53          | 49.5 |          | 43         | 61.4 |          | 74            | 44.8 |          |
| Poor                   | 7                      | 33.3 | 197         | 23.0 | .103     | 43          | 40.2 | .077     | 21         | 30.  | .038     | 72            | 43.6 | .096     |
| <b>Histology</b>       |                        |      |             |      |          |             |      |          |            |      |          |               |      |          |
| AAH/AIS                | 4                      | 19   | 43          | 5.0  |          | 1           | 0.9  |          | 1          | 1.4  |          | 9             | 5.5  |          |
| Lepidic                | 4                      | 19   | 93          | 10.9 |          | 5           | 4.7  |          | 1          | 1.4  |          | 8             | 4.8  |          |
| Acinar                 | 6                      | 28.6 | 455         | 53.2 |          | 34          | 31.8 |          | 26         | 37.1 |          | 58            | 35.2 |          |
| Papillary              | 3                      | 14.3 | 132         | 15.4 |          | 10          | 9.3  |          | 6          | 8.6  |          | 15            | 9.1  |          |
| Solid                  | 3                      | 14.3 | 85          | 9.9  |          | 33          | 30.8 |          | 20         | 28.6 |          | 58            | 35.2 |          |
| M-P                    | 0                      | 0.0  | 18          | 2.1  |          | 0           | 0    |          | 0          | 0    |          | 3             | 1.8  |          |
| IMA                    | 1                      | 4.8  | 14          | 1.6  |          | 22          | 20.6 |          | 16         | 22.9 |          | 10            | 6.1  |          |
| Enteric                | 0                      | 0.0  | 0           | 0.0  | .045     | 0           | 0    | .001     | 0          | 0    | .001     | 2             | 1.2  | .028     |

Abbreviations: LN, lymph nodes; AAH, Atypical adenomatous hyperplasia; AIS, adenocarcinoma *in situ* (AIS); M-P, micropapillary; IMA, Invasive mucinous adenocarcinoma

## Survival analyses

The median relapse-free survival (RFS) was 46.2 months for *MET* compared with 48.2 months for *EGFR* ( $P = 0.152$ ), 41.2 months for *KRAS* ( $P = 0.088$ ), 39.4 months for *ALK* ( $P = 0.462$ ), and 35 months for *HER2* ( $P = 0.13$ ). The median overall survival (OS) was 70 months for *MET* compared with 67.2 months for *EGFR* ( $P = 0.841$ ), 60 months for *KRAS* ( $P = 0.016$ ), 52.7 months for *ALK* ( $P = 0.95$ ), and 49.4 months for *HER2* ( $P = 0.321$ ) (Figure 2). Multivariate analysis was not feasible because of the small number of deaths in the *MET* mutation group.

### *EGFR* inhibitor demonstrates durable clinical response in a patient with advanced *MET* exon 14 skipping positive NSCLC

Among the 23 NSCLC patients with *MET* exon 14 skipping in our cohort, a 68 year-old non-smoker with *MET*, *EGFR*, and *HER2* gene copy number gains in his tumor had

relapsed. The patient showed a stable disease response to *EGFR* inhibitor Iressa, and the status had been maintained for 12 months (Figure 4). This modest clinical activity of Iressa might indicate that blockage of *EGFR* might serve as a salvage therapy for treatment of advanced *MET* exon 14 skipping positive patients if *MET* inhibitor is not available.

## DISCUSSION

In this study, we identified a subset of patients harboring *MET* exon 14 skipping as a novel oncogenic driver in lung cancers. As we previous reported [19], 90% of non-smoking lung adenocarcinomas (NSLAD) of East Asian populations were found to harbor known drivers that could be exploited as therapeutic targets. In this study, we examined 904 non-smoking NSLADs for all known oncogenic drivers. To the best of our knowledge, this study represents the most comprehensive analysis of mutation profiles in NSLADs. Of all non-smokers, 93.3% were found to carrying oncogenic driver mutations and 1.9% harbored *MET* exon 14 skipping. Given that *MET*

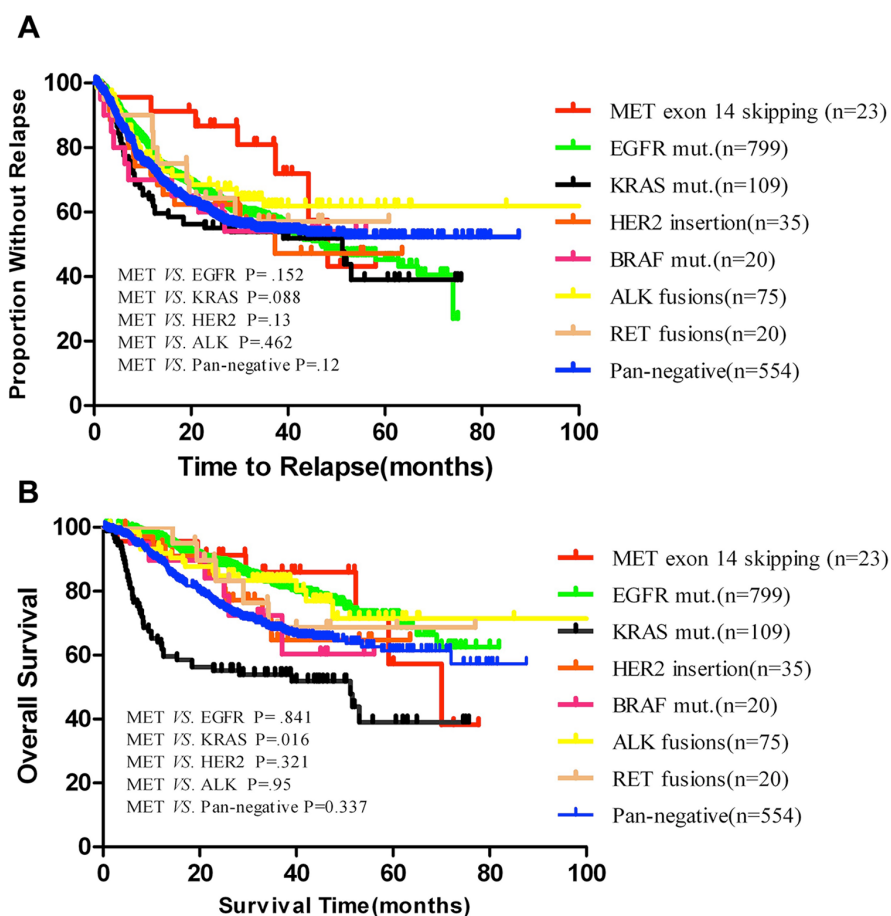

**Figure 2:** (A) Kaplan–Meier survival curves for relapse free according to *MET* exon 14 skipping or other known oncogenic drivers in 1635 NSCLC patients; (B) Overall survival according to *MET* exon 14 skipping or other known oncogenic drivers in 1393 NSCLC patients. Pan-negative indicates *EGFR*, *KRAS*, *HER2*, *BRAF*, *ALK*, *RET*, and *MET* negative.

**Table 3: Characteristics of non-small cell lung cancer patients with *MET* exon 14 skipping**

| Cases | Sex | Age | Smoking | P. | T.  | Subtype                  | Stage | <i>MET</i><br>IHC | <i>EGFR</i><br>CN | <i>HER2</i><br>CN | TTF1 |
|-------|-----|-----|---------|----|-----|--------------------------|-------|-------------------|-------------------|-------------------|------|
| 1     | F   | 67  | Never   | A  | 3.5 | Acinar                   | IB    | ++                | > 8               | > 6               | –    |
| 2     | F   | 77  | Never   | A  | 2   | Lepidic+Acinar           | IB    | +                 | > 4               | 2                 | +    |
| 3     | M   | 66  | Smoker  | A  | 4   | Papillary                | IIA   | ++                | > 4               | 2                 | +    |
| 4     | F   | 74  | Never   | A  | 2.3 | Lepidic                  | IA    | ++                | > 6               | 2                 | +    |
| 5     | F   | 54  | Never   | A  | 2   | Acinar+Papillary         | IB    | ++                | > 10              | 2                 | –    |
| 6     | M   | 60  | Smoker  | A  | 4.5 | Solid                    | IB    | ++                | > 7               | 2                 | +    |
| 7     | F   | 75  | Never   | A  | 2.5 | Solid                    | IB    | +++               | > 5               | 2                 | +    |
| 8     | F   | 60  | Never   | A  | 4   | Acinar+Lepidic           | IIB   | +                 | > 8               | 2                 | +    |
| 9     | F   | 62  | Never   | A  | 3   | Acinar+Solid             | IA    | ++                | > 5               | 2                 | +    |
| 10    | F   | 49  | Never   | A  | 1   | AAH                      | 0     | –                 | 2                 | 2                 | +    |
| 11    | F   | 60  | Never   | A  | 2.8 | Lepidic                  | IA    | +                 | 2                 | 4                 | +    |
| 12    | F   | 75  | Never   | A  | 2.5 | IMA+Acinar               | IA    | +                 | > 5               | 2                 | –    |
| 13    | M   | 76  | Never   | A  | 0.5 | Acinar                   | IA    | ++                | > 5               | > 5               | +    |
| 14    | M   | 76  | Smoker  | A  | 2.8 | Lepidic+Acinar           | IA    | –                 | > 5               | 3                 | +    |
| 15    | M   | 67  | Never   | A  | 1.5 | AIS                      | 0     | –                 | 2                 | 2                 | +    |
| 16    | F   | 57  | Never   | A  | 0.8 | AIS                      | 0     | +                 | 2                 | 2                 | +    |
| 17    | F   | 73  | Never   | A  | 4   | Papillary                | IIA   | +                 | 2                 | 2                 | +    |
| 18    | F   | 47  | Never   | A  | 0.9 | AIS                      | 0     | –                 | 2                 | 2                 | +    |
| 19    | F   | 63  | Never   | A  | 2   | Papillary+Micropapillary | IIA   | +                 | > 7               | 2                 | +    |
| 20    | M   | 68  | Smoker  | A  | 3.2 | Solid                    | IIA   | ++                | > 8               | > 3               | +    |
| 21    | M   | 68  | Never   | A  | 3.5 | Acinar+Solid             | IIIA  | +++               | > 5               | 3                 | +    |
| 22    | M   | 65  | Smoker  | AS | 10  | N.A.                     | IIB   | +                 | > 4               | 2                 | +    |
| 23    | F   | 77  | Never   | AS | 1.5 | N.A.                     | IA    | +                 | > 5               | > 4               | +    |

Abbreviations: F, female; M, male; P, pathology; T, tumor size (cm); AAH, atypical adenomatous hyperplasia; AIS, adenocarcinoma *in situ*; IHC, *MET* immunohistochemistry; *EGFR* CN, *EGFR* gene copy by *EGFR*-FISH analysis; *HER2* CN, *HER2* gene copy by *HER2*-FISH analysis; N.A., not available; AAH, Atypical adenomatous hyperplasia; AIS, adenocarcinoma *in situ* (AIS).

exon 14 skipping defines a distinct subset of NSCLC patients characterized by female, non-smoker, and older age, further prospective clinical trials could exploit these

clinical profiles to help clinicians select patients most likely to carry mutant *MET* and evaluate the clinical efficacy of *MET* inhibitor.

**Table 4: Comparison of clinicopathologic characteristics of patients with *MET* exon 14 skipping and with *MET* copy number gain in lung adenocarcinomas**

|                                      | <i>MET</i> E14 skipping | %      | <i>MET</i> copy number gain | %      | <i>P</i> |
|--------------------------------------|-------------------------|--------|-----------------------------|--------|----------|
| <b>Total</b>                         | 21                      |        | 47                          |        |          |
| <b>Gender</b>                        |                         |        |                             |        |          |
| Male                                 | 7                       | 33.33% | 22                          | 46.81% |          |
| Female                               | 14                      | 66.67% | 25                          | 53.19% | 0.427    |
| <b>Age</b>                           |                         |        |                             |        |          |
| ≥ 60 y                               | 17                      | 80.95% | 27                          | 57.45% |          |
| < 60 y                               | 4                       | 19.05% | 20                          | 42.55% | 0.052    |
| <b>Smoking status</b>                |                         |        |                             |        |          |
| Smoking                              | 4                       | 19.05% | 14                          | 29.79% |          |
| Never-smoking                        | 17                      | 80.95% | 33                          | 70.21% | 0.269    |
| <b>Tumor size</b>                    |                         |        |                             |        |          |
| < 3                                  | 13                      | 61.90% | 29                          | 61.70% |          |
| ≥ 3                                  | 8                       | 38.10% | 18                          | 38.30% | 1.000    |
| <b>Lymph Node status</b>             |                         |        |                             |        |          |
| 0                                    | 15                      | 71.43% | 28                          | 59.57% |          |
| 1                                    | 5                       | 23.81% | 5                           | 10.64% |          |
| 2                                    | 1                       | 4.76%  | 13                          | 27.66% |          |
| 3                                    | 0                       | 0.00%  | 1                           | 2.13%  | 0.103    |
| <b>Pathologic stage</b>              |                         |        |                             |        |          |
| 0                                    | 4                       | 19.05% | 1                           | 2.13%  |          |
| I                                    | 11                      | 52.38% | 23                          | 48.94% |          |
| II                                   | 5                       | 23.81% | 6                           | 12.77% |          |
| III                                  | 1                       | 4.76%  | 16                          | 34.04% |          |
| IV                                   | 0                       | 0.00%  | 1                           | 2.13%  | 0.016    |
| <b>Differentiation</b>               |                         |        |                             |        |          |
| Well                                 | 6                       | 28.57% | 3                           | 6.38%  |          |
| Moderate                             | 8                       | 38.10% | 25                          | 53.19% |          |
| Poor                                 | 7                       | 33.33% | 19                          | 40.43% | 0.043    |
| <b>Predominant histology subtype</b> |                         |        |                             |        |          |
| AAH/AIS                              | 4                       | 19.05% | 1                           | 2.13%  |          |
| Lepidic                              | 4                       | 19.05% | 2                           | 4.26%  |          |
| Acinar                               | 6                       | 28.57% | 22                          | 46.81% |          |
| Papillary                            | 3                       | 14.29% | 4                           | 8.51%  |          |
| Solid                                | 3                       | 14.29% | 11                          | 23.40% |          |
| Micropapillary                       | 0                       | 0.00%  | 1                           | 2.13%  |          |
| IMA                                  | 1                       | 4.76%  | 6                           | 12.77% | 0.046    |

Abbreviations: AAH, Atypical adenomatous hyperplasia; AIS, adenocarcinoma *in situ* (AIS); IMA, Invasive mucinous adenocarcinoma.

*MET* exon 14 skipping was not reckoned as a driver in lung cancer until the high-throughput sequencing revealed that this mutant kinase was mutually exclusive with known driver events [6, 7]. In TCGA's cohort, nine of 230 (3.9%) lung adenocarcinomas harbored *MET* exon 14 skipping mutation [6]. Seo JS, et al. reported three patients with *MET* exon 14 skipping mutation among a total of 200 patients, accounting for 1.5% in Asian populations [7]. Combined with our frequency of 1.6%, it seemed that Western populations had a slightly higher prevalence of the *MET* exon 14 skipping mutation than that of Asian populations. With the wide application of large-scale genome-sequencing technologies, many novel cancer-associated exon-skipping events have been identified [6, 7]. The copy number of known driver oncogenes, including *MET*, remains unchanged in most lung tumors [6, 7].

Garrett M.F. et al. demonstrated that NIH-3T3 cells stably expressed mutant *MET* showed anchorage-independent growth. This constitutive activity was sensitive to *MET* inhibitors in NIH-3T3 cells harboring *MET* exon 14 alterations [23]. It is interesting that five independent

studies almost simultaneously reported the efficacy of *MET* inhibitors (crizotinib and capmatinib) for treating patients harboring *MET* exon 14 skipping [15–18, 23]. Of the five studies, 11 patients are evaluable for responses to the *MET* inhibitor. The response rate was 83.3% (nine of 12 lesions) and the median progression free survival was five months (range of two to 13 months). The antitumor activity shown in early phase clinical trials strongly supports *MET* exon 14 skipping as a bona fide target of the *MET* inhibitor. However, the responses to the *MET* inhibitor are quite heterogeneous. There still remains a substantial amount of tumor cells that are intrinsically resistant to the *MET* tyrosine kinase inhibitor. The molecular basis of the response heterogeneity is largely unknown, and no biomarker is available for predicting a response.

Remarkably, almost four-fifths of the patients with *MET* exon 14 skipping in our cohort had *EGFR* and/or *HER2* gene copy number gains. Whether this observed consequence was a coincidence or an intrinsic connection remained unclear. One patient harboring *MET* exon 14 skipping simultaneously with *EGFR*, *HER2* gene copy

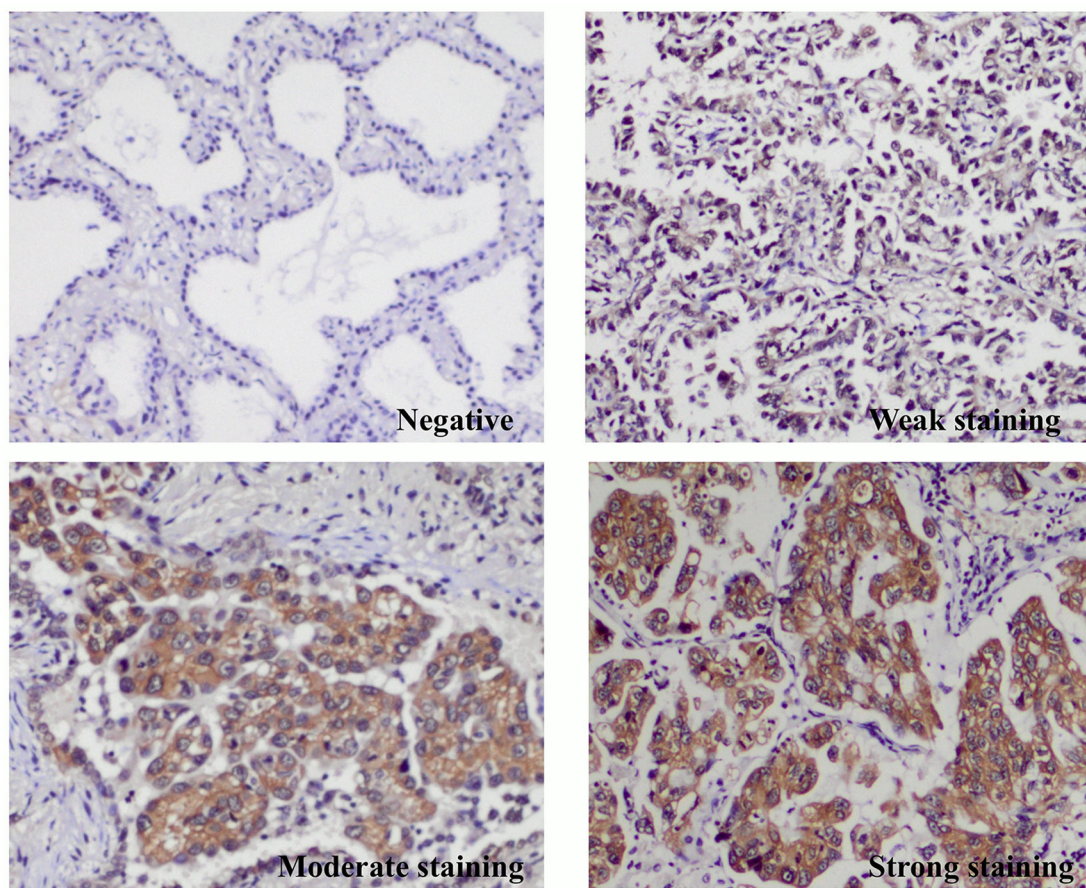

**Figure 3:** Representation of immunohistochemistry (IHC) staining of *MET* protein in pan-negative lung adenocarcinomas and *MET* exon 14 skipping positive non-small-cell lung cancers.

number gains received Iressa and maintained his disease for 12 months. It might be difficult to Figure out which alternation of genes played a more important role. Specific *MET* inhibitors should be an excellent choice according to the reported data; *EGFR*-TKIs, however may come to rescue as a replacement, especially when patients have had *EGFR* gene alternations. Since these three genes are essential in cell signaling, affecting various kinds of activities in cells such as survival, proliferation and invasion, completely understanding of the interaction of these genes is a necessity, and further experiments are

urgently demanded. Future possible therapeutic strategy may hide in this network by double or triple targeting these molecules.

In summary, *MET* exon 14 skipping defined a new molecular subset of NSCLC with identifiable clinical characteristics. These patients are typically older, female, and non-smokers who might benefit from *MET* targeted therapy. Most of the lung tumors with *MET* exon 14 skipping had *EGFR* and/or *HER2* gene copy number gains. Additionally, the therapeutic *EGFR* inhibitors might be an alternative treatment for patients with *MET* mutant NSCLC.

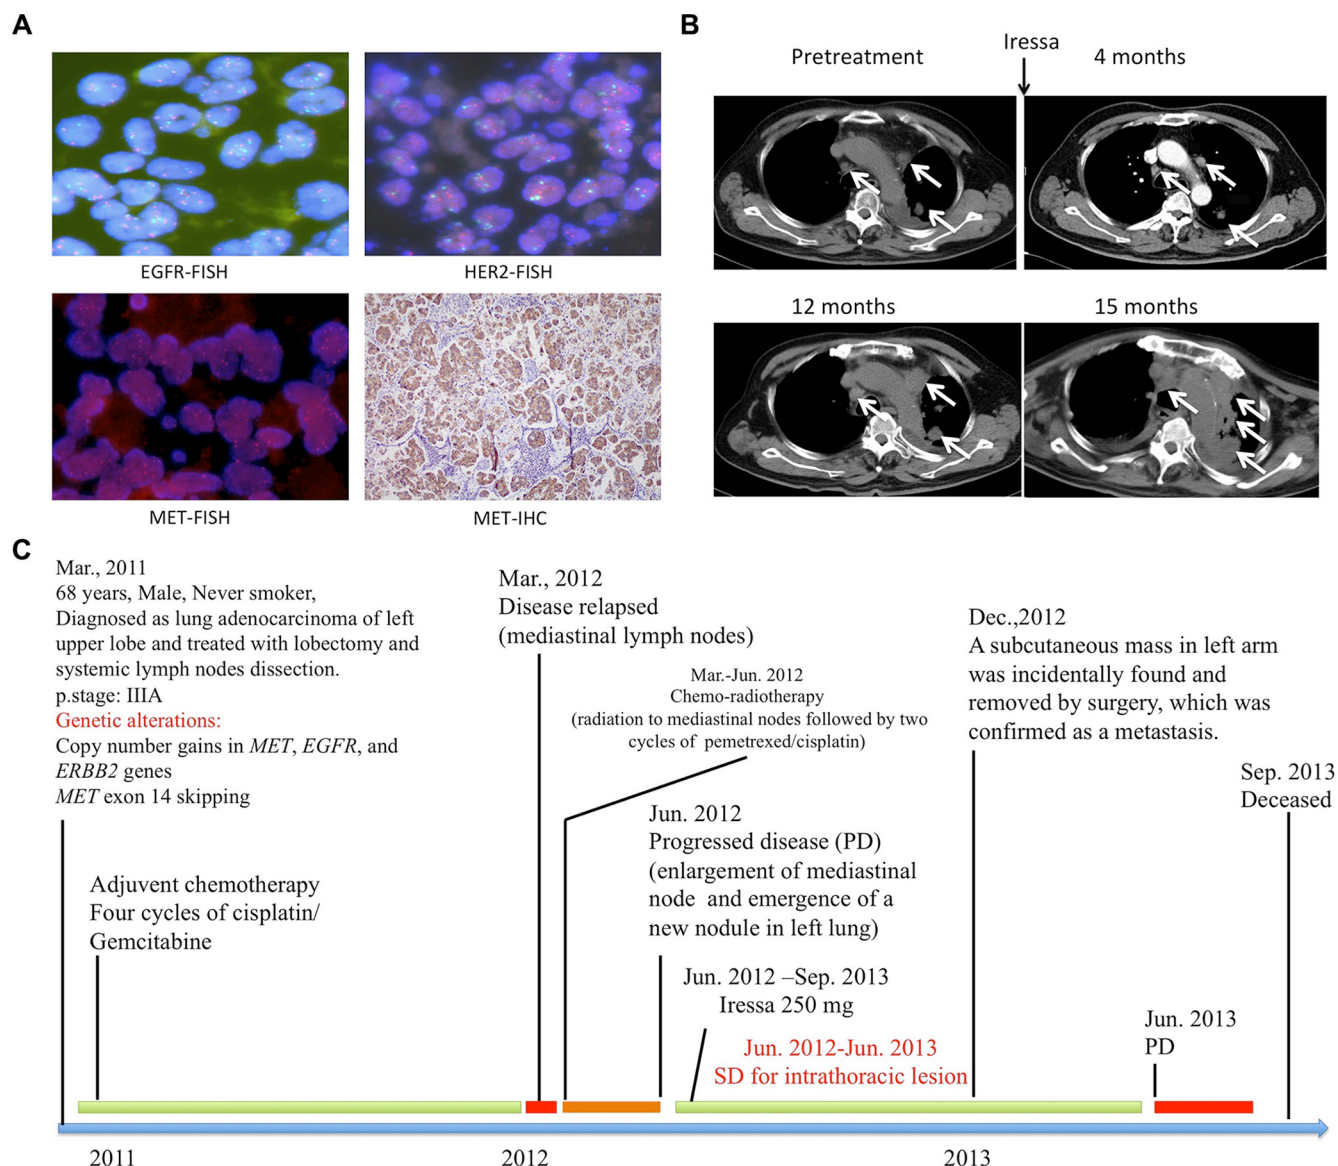

**Figure 4: *EGFR* inhibitor shows durable clinical response in a patient harboring *MET* exon 14 skipping.** (A) FISH indicated that a *MET* exon 14 skipping positive non-smoker harbored *EGFR*, *HER2*, and *MET* copy number gains; IHC showed that this patient's tumor was positive for *MET* expression; (B) CT scan of the thorax demonstrating mediastinal lymph nodes enlargement and a left lobe mass before and after treatment with oral Iressa daily; (C) Timeline of the patient with *MET* exon 14 skipping lung.

## MATERIALS AND METHODS

### Patients and tissues

From October 2007 to June 2013, a total of 1770 frozen surgically resected NSCLC tumor tissues, including 1305 lung adenocarcinomas, 48 adenosquamous carcinoma and 417 squamous cell carcinomas, were prospectively collected in the Department of Thoracic Surgery of Fudan University Shanghai Cancer Center. This study was approved by the Institutional Review Board of the Fudan University Shanghai Cancer Center. All patients provided written informed consent. Two pathologists (Y.L. and X.X.S.) confirmed the diagnosis by H&E staining and verified by immunohistochemistry as *TTF1*, *P63*, *Napsin A* and *CK5/6*. DNA and RNA were collected as previously reported [19, 20].

### Mutational analyses

As previously reported [5, 19–21], mutational status of *EGFR*, *KRAS*, *HER2*, *BRAF*, *CTNNB1*, *PIK3CA*, *ALK*, *RET*, *ROS1*, *NRG1*, *FGFR1*, *FGFR2*, and *FGFR3* was detected. *MET* (exon 13 to 21) was PCR amplified using cDNA for direct sequencing and exon 14 deleted cases were verified by sequencing of the PCR product of *MET* exon 13 to 15. Primers were shown in Supplementary Table S1. Quantitative Real-Time PCR was used to detect *MET* gene copy number gain as previously reported [22].

### Immunohistochemistry (IHC)

Standard 5- $\mu$ m formalin-fixed paraffin-embedded sections were subjected to IHC analysis using anti-*MET* (Cell Signaling Technology), *P40* ( $\Delta$ P63, Fuzhou Maxim Biotech, Ltd. China), and *TTF-1* (clone: SPT24, Ready-to-use antibody, Fuzhou Maxim Biotech, Ltd. China) antibodies.

### Clinicopathological characteristics

Clinical and pathologic data were prospectively collected for analyses, including age at diagnosis, sex, smoking history, histologic type, pathologic TNM stage, tumor size, and tumor differentiation. Patients were observed in clinic or by telephone for disease recurrence and survival from the date of diagnosis. Of the 1770 NSCLC patients, 56 patients who were incidentally found to have pleural metastasis were excluded from survival analysis. Seventy-nine patients of loss to follow-up were also excluded. A total of 1635 NSCLC patients were included for analysis with a median follow-up time of 32.83 months.

### Statistical analysis

Associations between mutations and clinical and pathologic characteristics were analyzed by the  $\chi^2$  test or Fisher's exact test. Survival curves were estimated using the Kaplan-Meier method, with differences in survival assessed by the log-rank test. Data were analyzed using Statistical Package for the Social Sciences Version 19.0 Software (SPSS Inc.). The two-sided significance level was set at  $p < 0.05$ .

### ACKNOWLEDGMENTS

We thank Dr. Matthew Meyerson and Dr. William Pao for valuable advice regarding this study.

### CONFLICTS OF INTEREST

The authors declare no conflicts of interest.

### FINANCIAL SUPPORT

The authors have reported to Oncotarget that no potential conflicts of interest exist with any companies/organizations whose products or services may be discussed in this article.

### RESEARCH SUPPORT

This work was supported by the National Natural Science Foundation of China (81330056, 81401886, 81401891, 81422029, 81472173 and 81372525), the Key Project of Science and Technology Commission of Shanghai Municipality (JGGG1302), Wu Jieping Medical Foundation (320.6750.14317) and Shen-Kang Center Project (SKMB1201), Shanghai rising star program (16QA1403500).

### Role of the sponsors

The sponsors had no role in the design of the study, the collection and analysis of the data, or the preparation of the manuscript.

### REFERENCES

1. Pao W, Girard N. New driver mutations in non-small-cell lung cancer. *Lancet Oncol.* 2011; 12:175–80.
2. Lynch TJ, Bell DW, Sordella R, Gurubhagavatula S, Okimoto RA, Brannigan BW, Harris PL, Haserlat SM, Supko JG, Haluska FG, Louis DN, Christiani DC, Settleman J, et al. Activating mutations in the epidermal growth factor receptor underlying responsiveness of non-small-cell lung cancer to gefitinib. *N Engl J Med.* 2004; 350:2129–39.

3. Shaw AT, Kim DW, Nakagawa K, Seto T, Crinó L, Ahn MJ, De Pas T, Besse B, Solomon BJ, Blackhall F, Wu YL, Thomas M, O'Byrne KJ, et al. Crizotinib versus chemotherapy in advanced ALK-positive lung cancer. *N Engl J Med*. 2013; 368:2385–94.
4. Li H, Pan Y, Li Y, Li C, Wang R, Hu H, Zhang Y, Ye T, Wang L, Shen L, Sun Y, Chen H. Frequency of well-identified oncogenic driver mutations in lung adenocarcinoma of smokers varies with histological subtypes and graduated smoking dose. *Lung Cancer*. 2013; 79:8–13.
5. Pan Y, Wang R, Ye T, Li C, Hu H, Yu Y, Zhang Y, Wang L, Luo X, Li H, Li Y, Shen L, Sun Y, et al. Comprehensive Analysis of Oncogenic Mutations in Lung Squamous Cell Carcinoma with Minor Glandular Component. *Chest*. 2014; 145:473–9.
6. Cancer Genome Atlas Research Network. Comprehensive molecular profiling of lung adenocarcinoma. *Nature*. 2014; 511:543–550.
7. Seo JS, Ju YS, Lee WC, Shin JY, Lee JK, Bleazard T, Lee J, Jung YJ, Kim JO, Shin JY, Yu SB, Kim J, Lee ER, et al. The transcriptional landscape and mutational profile of lung adenocarcinoma. *Genome Res*. 2012; 22:2109–19.
8. Cappuzzo F, Marchetti A, Skokan M, Rossi E, Gajapathy S, Felicioni L, Del Grammastio M, Sciarrotta MG, Buttitta F, Incarbone M, Toschi L, Finocchiaro G, Destro A, et al. Increased MET Gene Copy Number Negatively Affects Survival of Surgically Resected Non-Small-Cell Lung Cancer Patients. *J Clin Oncol*. 2009; 27:1667–74.
9. Birchmeier C, Birchmeier W, Gherardi E, Vande Woude GF. Met, metastasis, motility and more. *Nat Rev Mol Cell Biol*. 2003; 4:915–25.
10. Lutterbach B, Zeng Q, Davis LJ, Hatch H, Hang G, Kohl NE, Gibbs JB, Pan BS. Lung cancer cell lines harboring MET gene amplification are dependent on Met for growth and survival. *Cancer Res*. 2007; 67:2081–8.
11. Engelman JA, Zejnullahu K, Mitsudomi T, Song Y, Hyland C, Park JO, Lindeman N, Gale CM, Zhao X, Christensen J, Kosaka T, Holmes AJ, Rogers AM, et al. MET Amplification Leads to Gefitinib Resistance in Lung Cancer by Activating ERBB3 Signaling. *Science*. 2007; 316:1039–43.
12. Camidge DR, Ou SH, Shapiro G, Otterson GA, Villaruz LC, Villalona-Calero MA, Iafrate J, Varella-Garcia M, Dacic S, Cardarella S, Zhao W, Tye L, Stephenson P, et al. Efficacy and safety of crizotinib in patients with advanced c-MET-amplified non-small cell lung cancer (NSCLC). *J Clin Oncol*. 2014; 32:5s.
13. Spigel DR, Edelman MJ, O'Byrne k, Paz-Ares L, Shames DS, Yu W, Paton VE, Mok T. Onartuzumab plus erlotinib versus erlotinib in previously treated stage IIIB or IV NSCLC: Results from the pivotal phase III randomized, multicenter, placebo-controlled METLung (OAM4971g) global trial. *J Clin Oncol*. 2014; 32:5s.
14. Kong-Beltran M, Seshagiri S, Zha J, Zhu W, Bhawe K, Mendoza N, Holcomb T, Pujara K, Stinson J, Fu L, Severin C, Rangell L, Schwall R, et al. Somatic Mutations Lead to an Oncogenic Deletion of Met in Lung Cancer. *Cancer Res*. 2006; 66:283–289.
15. Jenkins RW, Oxnard GR, Elkin S, Sullivan EK, Carter JL, Barbie DA. Response to Crizotinib in a Patient With Lung Adenocarcinoma Harboring a MET Splice Site Mutation. *Clin Lung Cancer*. 2015; 16:e101–4.
16. Waqar SN1, Morgensztern D, Sehn J. MET Mutation Associated with Responsiveness to Crizotinib. *J Thorac Oncol*. 2015; 10:e29–31.
17. Mendenhall MA, Goldman JW. MET-Mutated NSCLC with Major Response to Crizotinib. *J Thorac Oncol*. 2015; 10:e33–4.
18. Paik PK, Drilon A, Fan PD, Yu H, Rekhtman N, Ginsberg MS, Borsu L, Schultz N, Berger MF, Rudin CM, Ladanyi M. Response to MET inhibitors in patients with stage IV lung adenocarcinomas harboring MET mutations causing exon 14 skipping. *Cancer Discov*. 2015; pii: CD-14-1467.
19. Sun Y, Ren Y, Fang Z, Li C, Fang R, Gao B, Han X, Tian W, Pao W, Chen H, Ji H. Lung Adenocarcinoma From East Asian Never-Smokers Is a Disease Largely Defined by Targetable Oncogenic Mutant Kinases. *J Clin Oncol*. 2010; 28:4616–20.
20. Wang R, Wang L, Li Y, Hu H, Shen L, Shen X, Pan Y, Ye T, Zhang Y, Luo X, Zhang Y, Pan B, Li B, et al. FGFR1/3 tyrosine kinase fusions define a unique molecular subtype of non-small cell lung cancer. *Clin Cancer Res*. 2014; 20:4107–14.
21. Wang R, Pan Y, Li C, Zhang H, Garfield D, Li Y, Ye T, Hu H, Luo X, Li H, Zhang Y, Zhang J, Zhou X, et al. Analysis of major known driver mutations and prognosis in resected adenosquamous lung carcinomas. *J Thorac Oncol*. 2014; 9:760–8.
22. Bean J, Brennan C, Shih JY, Riely G, Viale A, Wang L, Chitale D, Motoi N, Szoke J, Broderick S, Balak M, Chang WC, Yu CJ, et al. MET amplification occurs with or without T790M mutations in EGFR mutant lung tumors with acquired resistance to gefitinib or erlotinib. *Proc Natl Acad Sci USA*. 2007; 104:20932–20937.
23. Frampton GM, Ali SM, Rosenzweig M, Chmielecki J, Lu X, Bauer TM, Akimov M, Bufill JA, Lee C, Jentz D, Hoover R, Ou SH, Salgia R, et al. Activation of MET via diverse exon 14 splicing alterations occurs in multiple tumor types and confers clinical sensitivity to MET inhibitors. *Cancer Discov*. 2015; 5:842–9.
